# Supplementary material
Source: HighWire-hosted journal article supplement (https://clincancerres.aacrjournals.org/content/suppl/2010/08/13/1078-0432.CCR-10-0672)
Supplement: Supplementary_Data.pdf [file Supplementary_Data.pdf]

Supplementary Figure 1

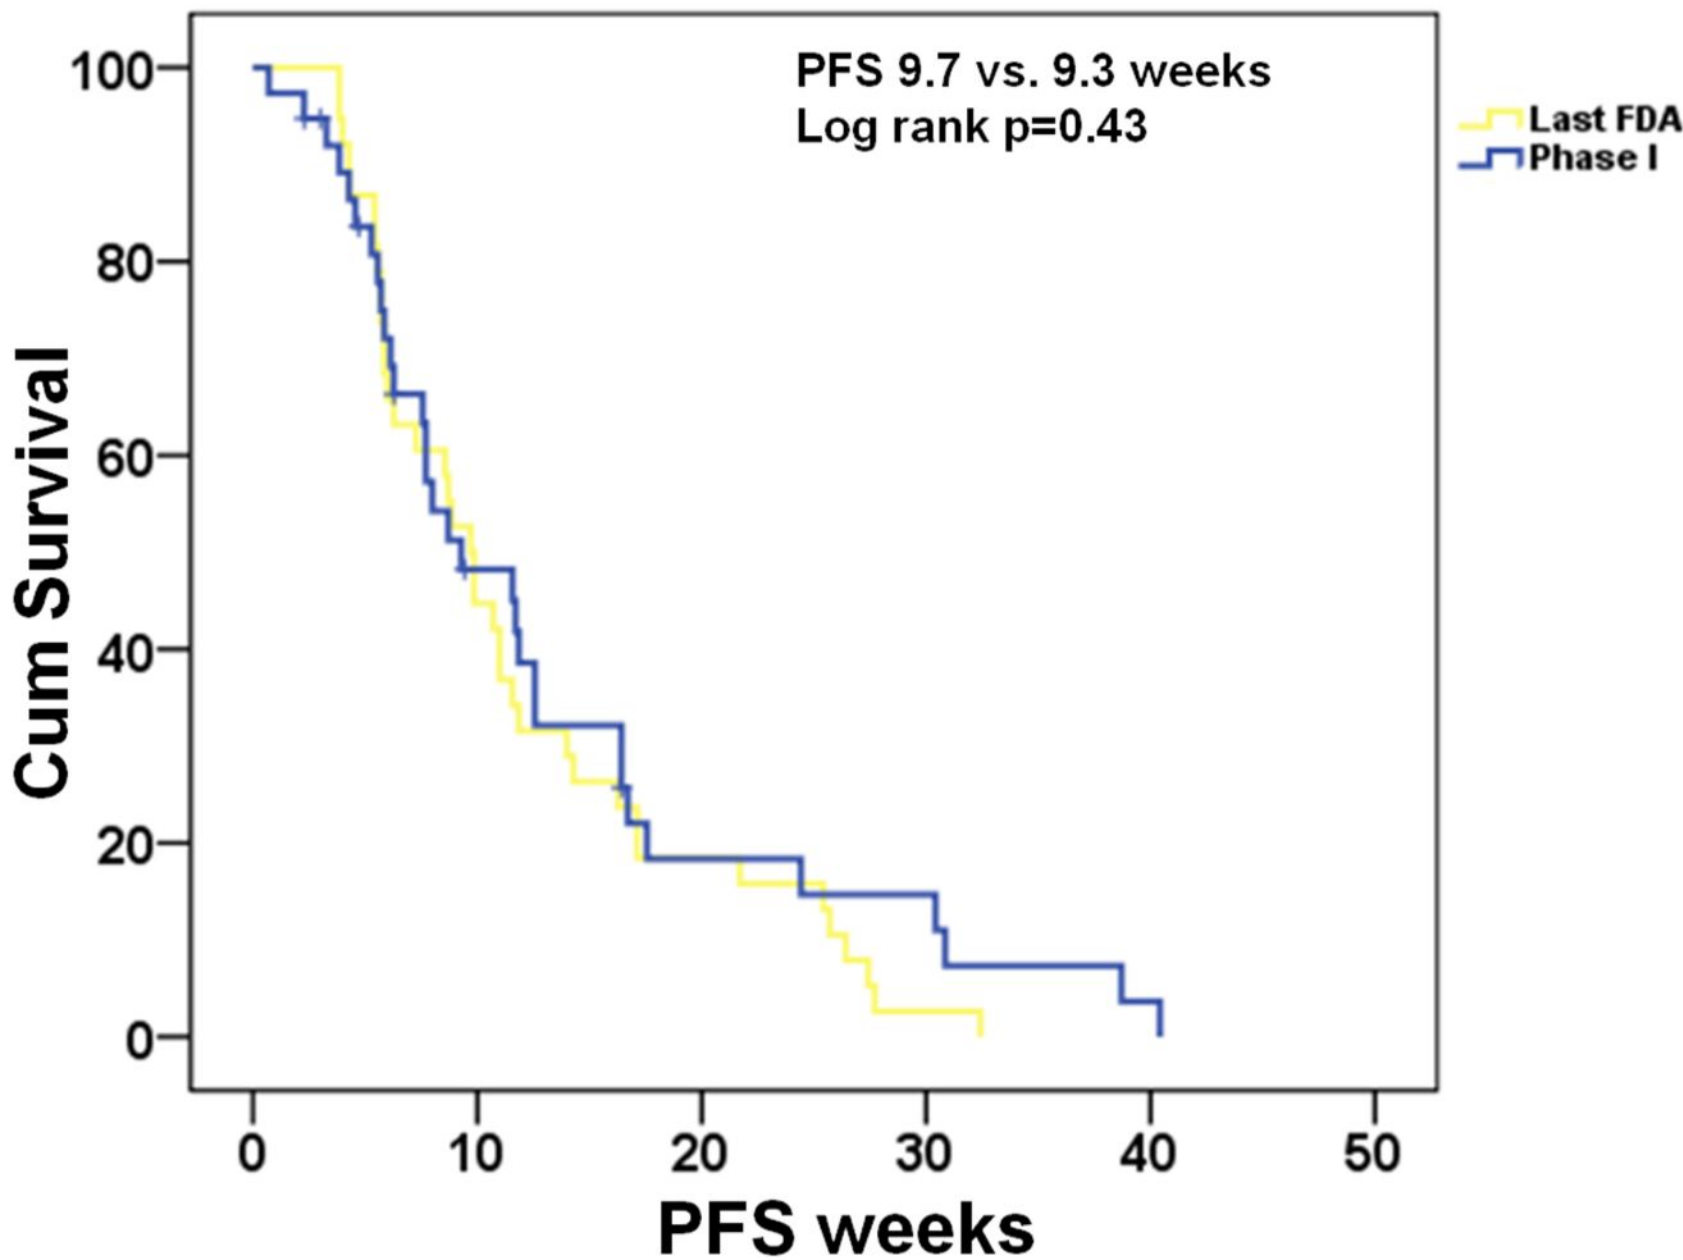

**Supplementary Figure S1. The median PFS in phase I trials was not inferior to the median PFS on the last FDA-approved therapy for the subset of patients with HNSCC.**

**SUPPLEMENTARY TABLE 1. Summary of last treatment prior to inclusion in phase I trials. All patients received treatments using FDA-approved drugs as the backbone of therapy.**

| <b>TREATMENT GROUP</b> | <b>DRUGS</b>                     | <b>Number</b>   |
|------------------------|----------------------------------|-----------------|
| <b>PLATINUM-BASED</b>  | Carboplatin-Taxol                | 8               |
|                        | Cisplatin-Taxol                  | 1               |
|                        | Cisplatin-Vinorelbine            | 1               |
|                        | Carboplatin -Docetaxel           | 1               |
|                        | Carboplatin -Gemcitabine         | 1               |
|                        | Carboplatin -Taxol-TMP470        | 1               |
|                        | Carboplatin -Docetaxel-Cetuximab | 1               |
|                        | Carboplatin -Docetaxel-Tarceva   | 1               |
|                        | Cisplatin-5FU-Docetaxel          | 1               |
|                        | Carboplatin -Taxol-Cetuximab     | 2               |
|                        | Cisplatin -Cetuximab             | 1               |
|                        | Cisplatin -Taxol-5FU-Cetuximab   | 1               |
|                        | <b>TOTAL PLATINUM</b>            | <b>20 (34%)</b> |
|                        | <b>Anti-EGFR</b>                 | Cetuximab       |
| Gefitinib              |                                  | 7               |
| Erlotinib              |                                  | 6               |
| Cetuximab-Ifosfamide   |                                  | 2               |
| Cetuximab-IMCA12       |                                  | 1               |
| Cetuximab-Avastin      |                                  | 1               |
| <b>TOTAL ANTI-EGFR</b> |                                  | <b>25 (42%)</b> |

| <b>TREATMENT GROUP</b>  | <b>DRUGS</b>                  | <b>Number</b>    |
|-------------------------|-------------------------------|------------------|
| <b>Taxanes</b>          | Docetaxel                     | 2                |
|                         | Docetaxel-Lonafarnib          | 1                |
|                         | Docetaxel-Cetuximab           | 1                |
|                         | <b>TOTAL TAXANES</b>          | <b>4 (7%)</b>    |
| <b>Antifolates</b>      | Alimta                        | 8                |
|                         | <b>TOTAL ANTIFOLATES</b>      | <b>8 (14%)</b>   |
| <b>Other cytotoxics</b> | Gemcitabine                   | 1                |
|                         | Adriamycin-Ciclofosfamide     | 1                |
|                         | <b>TOTAL OTHER CYTOTOXICS</b> | <b>2 (3%)</b>    |
|                         | <b>TOTAL</b>                  | <b>59 (100%)</b> |

TMP470 (antiangiogenic), 5FU (5-Fluoruracil), IMCA12 (monoclonal antibody anti-IGFR)
